# Supplementary material
Source: PubMed Central journal article supplement (PMC9124672)
Supplement: NIHMS1777252-supplement-1.pdf [file NIHMS1777252-supplement-1.pdf]

## **APPENDIX**

### **SUPPLEMENTARY METHODS**

**1. IRI store selection and coverage.** We contracted with the company IRI, which allows researchers to purchase the proprietary data IRI receives from major chain retailers. The authors had no role in the selection of study stores. Retailers in the IRI data either provide sales for all stores or for a statistically representative sample (1). All retail chains are included in IRI for all store types except supermarkets, which must have  $\geq$ \$2 million in annual sales (these account for ~96% of total sales volume among supermarkets) (1). Compared to Census Bureau estimates, IRI captures 50% of food sales in supermarkets, 119% of food sales in pharmacies (>100% attributed to differences in category definitions), and 79% of food sales in mass merchandisers (1). The same retailers were included for all cities in the study.

Reference:

1. Muth MK, Sweitzer M, Brown D, Capogrossi K, Karns S, Levin D, et al. Understanding IRI household-based and store-based scanner data. U.S. Department of Agriculture, Economic Research Service; 2016.

**2. Beverage classification.** We classified 47% of beverages based on their IRI subcategory. For the remainder that could not be classified based on broad subcategory alone (e.g., juices, some of which are 100% fruit juice and therefore nontaxed, while others have added sugars and therefore subject to the tax), 2 research assistants independently classified beverages based on beverage ingredients or, when ingredients were unavailable, based on similar products (e.g., same manufacturer and brand but different flavor). Coding discrepancies were reconciled through discussion.

For beverage subtype analyses, we considered 11 subtypes, 7 of which were taxed (regular soda, diet soda, fruit drinks, sports drinks, energy drinks, iced tea/lemonade, and coffee drinks) and 4 of which were nontaxed (water, milk, fruit juice, and sparkling water). We excluded beverages that were classified as “other beverages” because this was a heterogeneous group (e.g., flavored waters, milk alternatives, energy shots, etc.) that comprised many different types of low-selling beverages but only cumulatively made up 2.5% of pre-tax volume sales. We did not analyze energy drink sales because of violations of parallel trends for both Philadelphia vs Baltimore and PA border ZIP codes vs MD border ZIP codes.

**3. Weights for price-per-ounce analyses.** Our price-per-ounce analyses were weighted by pre-tax volume by UPC and store type. This was done so that our estimates reflected the higher pre-tax demand for some UPCs while also accounting for higher demand in some store types. To create these weights, we first found the total amount of volume sold of a given UPC across all stores of a given store type (e.g., the total volume sold of a UPC across all supermarkets). We then divided this by the total volume sold of all UPCs in the pre-tax period to create the weight. The weights thus reflect the probability of buying a specific UPC in a specific store type.

**Appendix**  
**Sustained Impact of the Philadelphia Beverage Tax on Beverage Prices and Sales Over 2 Years**  
**Petimar et al.**

We have illustrated this with a simplified example, imagining there were only 2 UPCs in the entire dataset:

Pre-tax volume sold (ounces)

|              | Supermarkets | Mass merchandisers | Pharmacies | <b>Total</b> |
|--------------|--------------|--------------------|------------|--------------|
| UPC X        | 200          | 150                | 20         | <b>370</b>   |
| UPC Y        | 50           | 50                 | 5          | <b>105</b>   |
| <b>Total</b> | <b>250</b>   | <b>200</b>         | <b>25</b>  | <b>475</b>   |

Weights

|       | Supermarkets | Mass merchandisers | Pharmacies |
|-------|--------------|--------------------|------------|
| UPC X | 0.42         | 0.32               | 0.04       |
| UPC Y | 0.11         | 0.11               | 0.01       |

As we demonstrate, the weights reflect the probability of buying that UPC in that store type (e.g., the probability of buying UPC X in a supermarket =  $200/475 = 0.42$ ). When applied to our regressions, this weighting allows the difference-in-differences estimate (and hence tax pass-through) to reflect demand for UPCs. Previous beverage tax studies have weighted price analyses by the joint distribution of volume sold with other beverage characteristics (2, 3).

References:

2. Leider J, Li Y, Powell LM. Pass-through of the Oakland, California, sugar-sweetened beverage tax in food stores two years post-implementation: A difference-in-differences study. *PLoS One*. 2021;16(1):e0244884
3. Falbe J, Lee MM, Kaplan S, Rojas NA, Ortega Hinojosa AM, Madsen KA. Higher Sugar-Sweetened Beverage Retail Prices After Excise Taxes in Oakland and San Francisco. *Am J Public Health*. 2020:e1-e7

**4. Calculating percent offset.** We calculated the degree to which increased cross-border shopping offset the decreases in Philadelphia as:  $[(DD \text{ percent change}) - (\text{percent change adjusted for increased border shopping})]/(DD \text{ percent change})$ .

**5. Number of comparisons adjusted for.** We adjusted for the number of tests conducted within a city. For example, results for change in beverage price per ounce after tax implementation were adjusted for 8 comparisons in Philadelphia and 7 in PA border ZIP codes (because we did not analyze family-sized beverages in PA border ZIP codes).

**6. Parallel trends tests for price change analyses.** Below we present a table with *p*-values for the parallel trends test (i.e., city\*time interaction term) for price change analyses. In cases where  $p < 0.05$ , we present the mean baseline price and the coefficient associated with the city\*time interaction term to provide context for the extent of the deviation from parallel trends. For all cases where  $p < 0.05$ , the coefficient for city\*time is extremely small. For example, although the city\*time interaction term that is used to test parallel trends had  $p = 0.002$  for total taxed beverages for PA border vs MD border stores, the coefficient was  $-0.002$  (95% CI:  $-0.003, -0.001$ ), suggesting that in the pre-tax period, the price/ounce of taxed beverages in PA border stores decreased by 0.002 cents/ounce per 4-week period vs MD border stores. The mean 2016

**Appendix**  
**Sustained Impact of the Philadelphia Beverage Tax on Beverage Prices and Sales Over 2 Years**  
**Petimar et al.**

price/ounce of taxed beverages in PA border stores was 3.48 cents/ounce. Over 1 year, the deviation in parallel trends equates to  $-0.026$  cents/ounce (i.e.,  $-0.002 \times 13$  four-week periods), which is  $-0.7\%$  of the baseline price.

Given the very small deviations we observed, we believe that the controls used in this study for beverage price change analyses are valid controls for all beverage types. The deviations we observed were likely statistically significant only due to the very large sample size of UPCs in this study. When a sample is large, the *p*-value alone is not sufficient to identify *meaningful* violations in the parallel trends assumption.

|                      | Philadelphia vs Baltimore |                         |                 | PA border vs MD border |                         |                 |
|----------------------|---------------------------|-------------------------|-----------------|------------------------|-------------------------|-----------------|
|                      | Mean 2016 price           | City*Time (95% CI)      | <i>p</i> -value | Mean 2016 price        | City*Time (95% CI)      | <i>p</i> -value |
| Taxed total          |                           |                         | 0.56            | 3.48                   | -0.002 (-0.003, -0.001) | 0.002           |
| Taxed individual     |                           |                         | 0.13            |                        |                         | 0.61            |
| Taxed family         |                           |                         | 0.13            | 2.97                   | -0.002 (-0.003, -0.001) | 0.0004          |
| Taxed SSB            |                           |                         | 0.75            | 3.49                   | -0.002 (-0.003, 0.00)   | 0.01            |
| Taxed ASB            | 3.51                      | -0.007 (-0.010, -0.004) | 0.03            | 3.42                   | -0.003 (-0.005, -0.001) | 0.02            |
| Non-taxed total      |                           |                         | 0.41            | 3.40                   | 0.005 (0.003, 0.007)    | 0.002           |
| Non-taxed individual |                           |                         | 0.05            | 8.75                   | -0.010 (-0.017, -0.003) | 0.005           |
| Non-taxed family     |                           |                         | 0.13            | 2.80                   | 0.006 (0.004, 0.007)    | 0.0004          |

We have also included graphs showing pre-tax trends in beverage prices for those outcomes with  $p < 0.05$ :

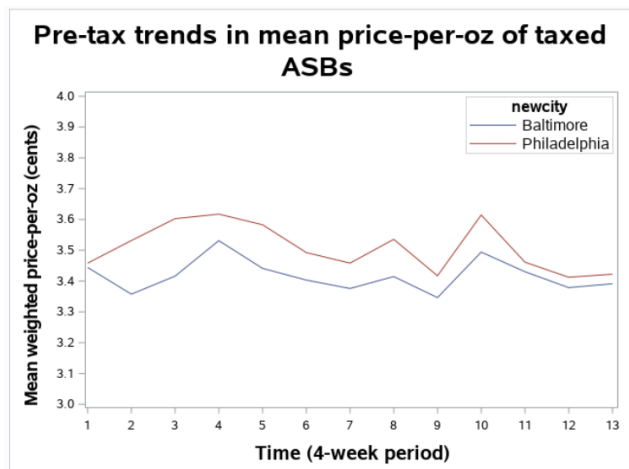

**Appendix**  
**Sustained Impact of the Philadelphia Beverage Tax on Beverage Prices and Sales Over 2 Years**  
**Petimar et al.**

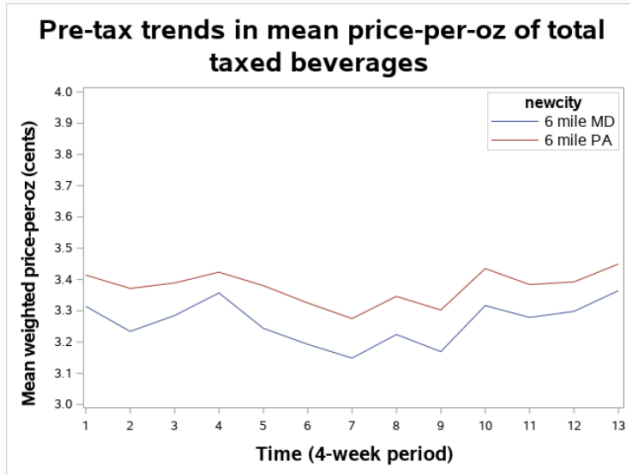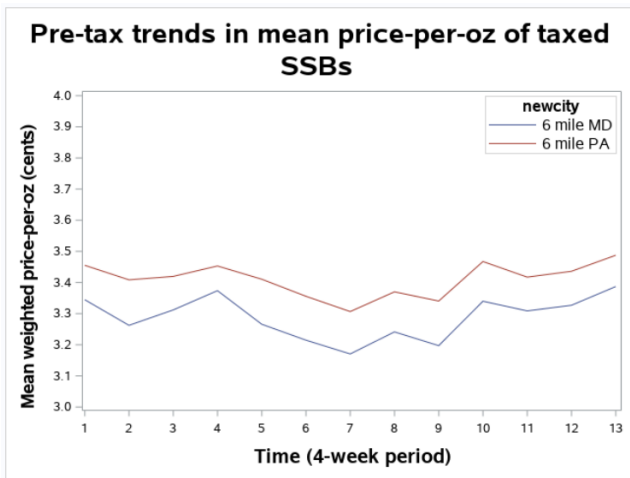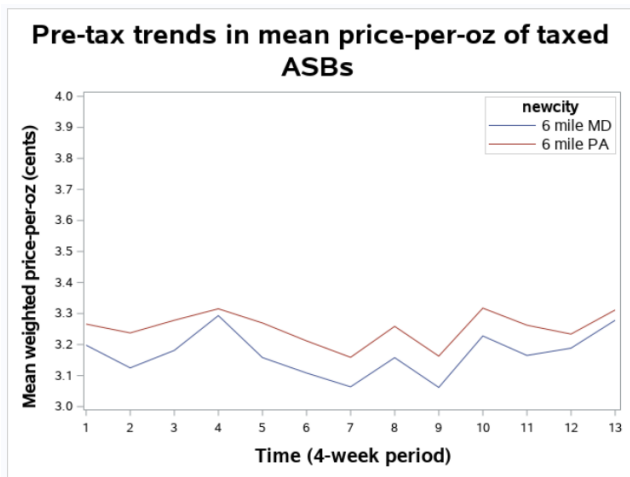

**Appendix**  
**Sustained Impact of the Philadelphia Beverage Tax on Beverage Prices and Sales Over 2 Years**  
**Petimar et al.**

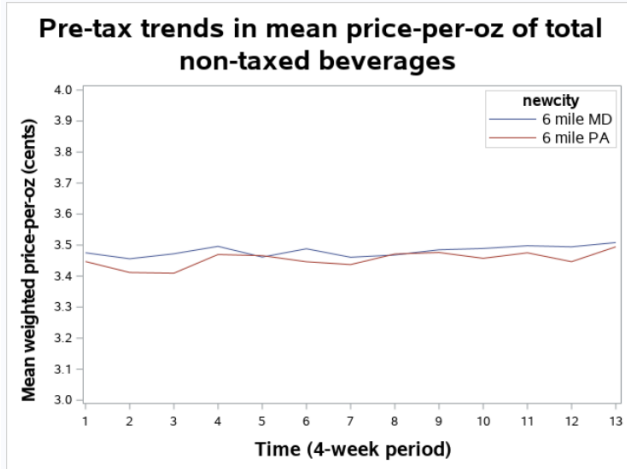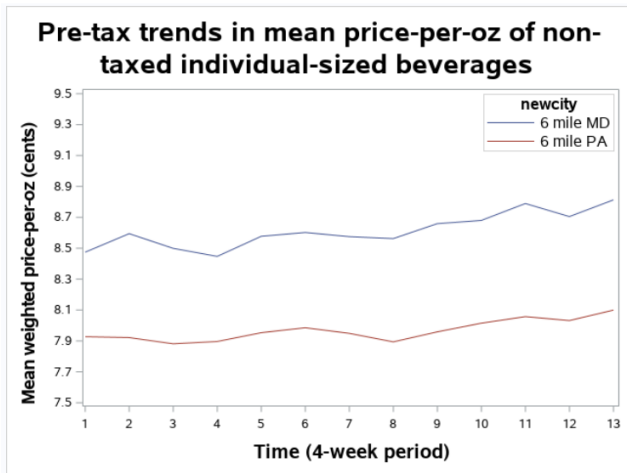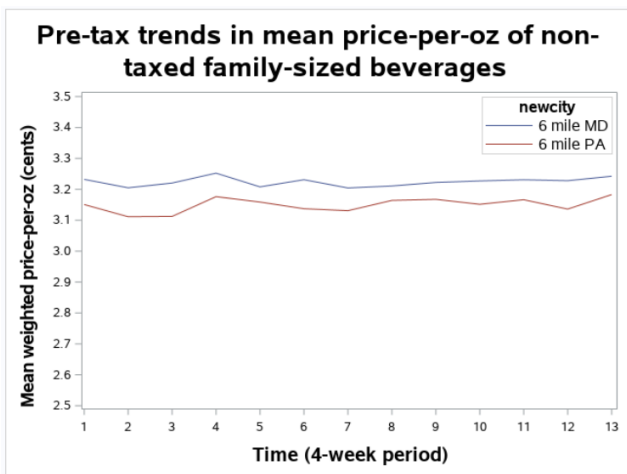

**Appendix**  
**Sustained Impact of the Philadelphia Beverage Tax on Beverage Prices and Sales Over 2 Years**  
**Petimar et al.**

**7. Parallel trends test for volume sales analyses.** We did not include outcomes that appeared to violate pre-tax parallel trends tests based on the city\*time *p*-value *and* visual inspection of pre-tax graphs (in Philadelphia: energy drinks, iced tea and lemonade, and sports drinks; in PA border counties: total ASBs, energy drinks, and milk). However, we included several outcomes that had  $p < 0.05$  for city\*time interaction terms, but that appeared to have parallel trends based on visual inspection. We present the *p*-values and graphs for those outcomes below:

Total taxed beverages for PA border vs MD border ( $p=0.03$ )

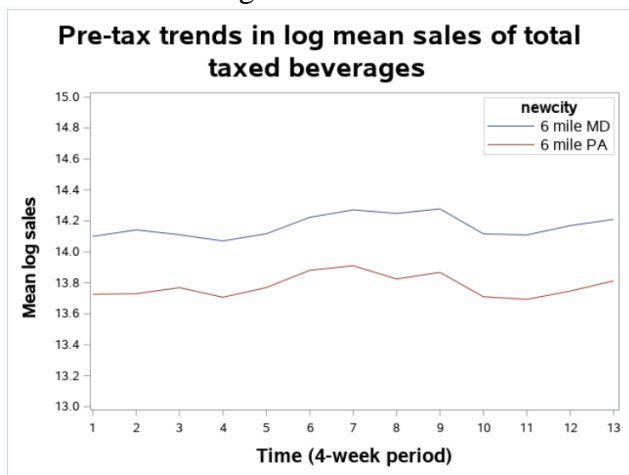

Taxed individual-sized beverages for PA border vs MD border ( $p=0.03$ )

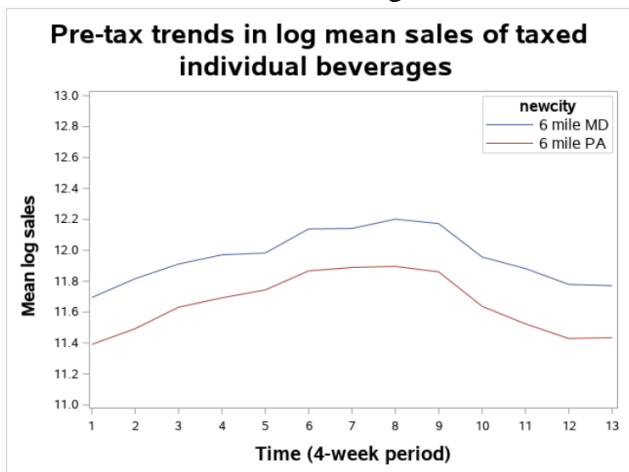

**Appendix**  
**Sustained Impact of the Philadelphia Beverage Tax on Beverage Prices and Sales Over 2 Years**  
**Petimar et al.**

Diet soda for PA border vs MD border ( $p=0.01$ )

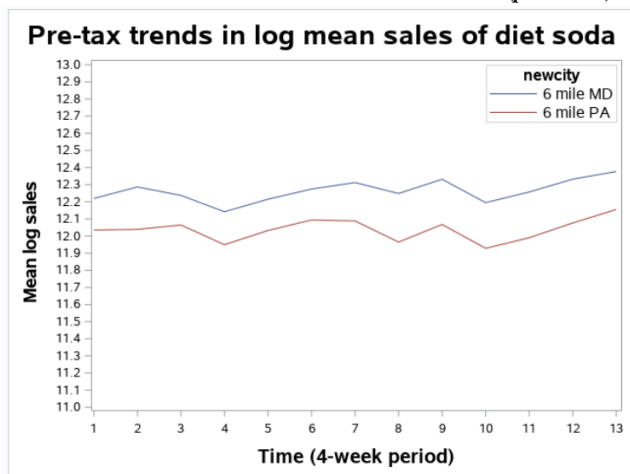

Sports drinks for PA border vs MD border ( $p=0.002$ )

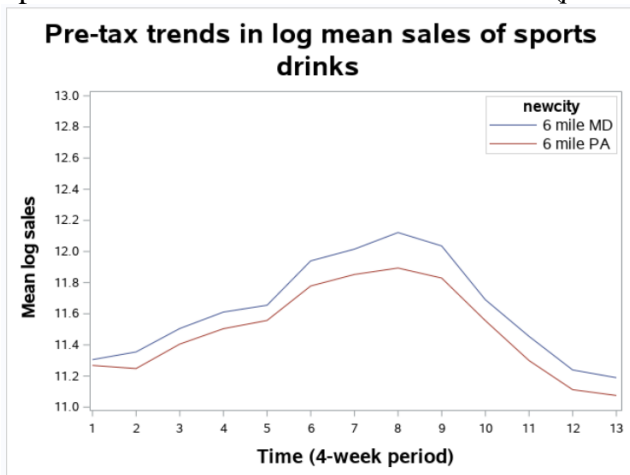

Wine for Philadelphia vs non-bordering PA counties ( $p=0.04$ )

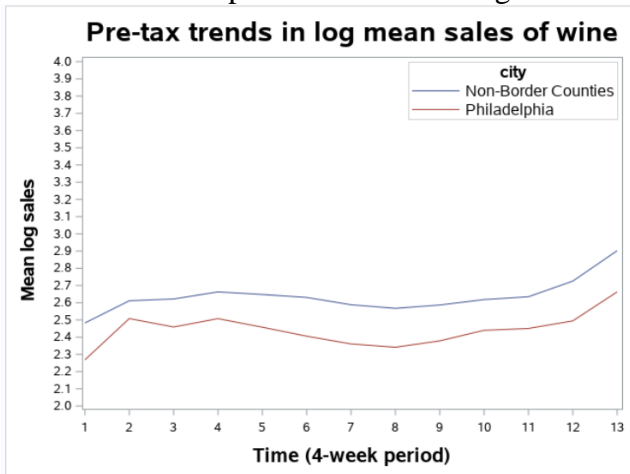

**Appendix**  
**Sustained Impact of the Philadelphia Beverage Tax on Beverage Prices and Sales Over 2 Years**  
**Petimar et al.**

Spirits/liquor for Philadelphia vs non-bordering PA counties ( $p=0.02$ )

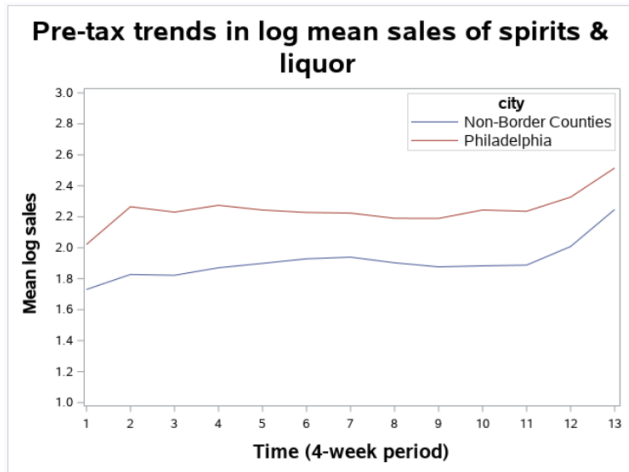



**Appendix**  
**Sustained Impact of the Philadelphia Beverage Tax on Beverage Prices and Sales Over 2 Years**  
**Petimar et al.**

**Appendix Table 1.** Pre-Tax Characteristics of Stores in the IRI Sample in Each Location Overall and by Store Type

| <b>Store type</b>        | <b>Number of stores</b> | <b>Total volume sales (ounces, millions)</b> |
|--------------------------|-------------------------|----------------------------------------------|
| <b>All stores</b>        |                         |                                              |
| Philadelphia             | 175                     | 5,232                                        |
| Baltimore                | 59                      | 1,279                                        |
| PA border ZIP codes      | 178                     | 4,970                                        |
| MD border ZIP codes      | 92                      | 3,245                                        |
| <b>Supermarkets</b>      |                         |                                              |
| Philadelphia             | 23                      | 3,482                                        |
| Baltimore                | 16                      | 1,109                                        |
| PA border ZIP codes      | 41                      | 3,578                                        |
| MD border ZIP codes      | 29                      | 1,812                                        |
| <b>Mass merchandiser</b> |                         |                                              |
| Philadelphia             | 12                      | 1,111                                        |
| Baltimore                | 1                       | 36                                           |
| PA border ZIP codes      | 17                      | 1,051                                        |
| MD border ZIP codes      | 15                      | 1,281                                        |
| <b>Pharmacies</b>        |                         |                                              |
| Philadelphia             | 140                     | 640                                          |
| Baltimore                | 42                      | 134                                          |
| PA border ZIP codes      | 120                     | 341                                          |
| MD border ZIP codes      | 48                      | 151                                          |

IRI, Information Resources, Inc.

**Appendix**  
**Sustained Impact of the Philadelphia Beverage Tax on Beverage Prices and Sales Over 2 Years**  
**Petimar et al.**

**Appendix Table 2.** Difference-in-Differences in Beverage Price Per Ounce 2 Years After Philadelphia Beverage Tax Implementation, by Store Type

| Outcome                                          | Mean (SD) pre-tax price per ounce <sup>a</sup> |                |                |                | Philadelphia vs Baltimore                       |                                       |                             | PA border vs MD border                          |                                       |
|--------------------------------------------------|------------------------------------------------|----------------|----------------|----------------|-------------------------------------------------|---------------------------------------|-----------------------------|-------------------------------------------------|---------------------------------------|
|                                                  | Philadelphia                                   | Baltimore      | PA border      | MD border      | Difference-in-differences (95% CI) <sup>b</sup> | Adjusted <i>p</i> -value <sup>c</sup> | % pass-through <sup>d</sup> | Difference-in-differences (95% CI) <sup>b</sup> | Adjusted <i>p</i> -value <sup>c</sup> |
| <b>Taxed beverages: all</b>                      |                                                |                |                |                |                                                 |                                       |                             |                                                 |                                       |
| Supermarket                                      | 3.20<br>(1.55)                                 | 3.23<br>(1.57) | 3.12<br>(1.53) | 3.09<br>(1.53) | 0.72<br>(0.64, 0.80)                            | <b>&lt;0.0001</b>                     | 48%                         | 0.03<br>(0.01, 0.05)                            | <b>0.01</b>                           |
| Pharmacy                                         | 4.15<br>(2.90)                                 | 4.23<br>(2.99) | 4.19<br>(3.04) | 4.18<br>(3.01) | 1.43<br>(1.34, 1.52)                            | <b>&lt;0.0001</b>                     | 95%                         | 0.01<br>(-0.02, 0.04)                           | 0.67                                  |
| Mass merchandiser                                | –                                              | –              | 3.14<br>(1.80) | 3.12<br>(1.80) | –                                               | –                                     | –                           | 0.00<br>(-0.01, 0.02)                           | 0.74                                  |
| <b>Taxed beverages: individual-sized</b>         |                                                |                |                |                |                                                 |                                       |                             |                                                 |                                       |
| Supermarket                                      | 5.78<br>(3.02)                                 | 5.77<br>(3.12) | 5.87<br>(3.04) | 5.69<br>(3.11) | 0.67<br>(0.54, 0.80)                            | <b>&lt;0.0001</b>                     | 45%                         | -0.07<br>(-0.12, -0.01)                         | 0.09                                  |
| Pharmacy                                         | 6.79<br>(3.55)                                 | 6.91<br>(3.61) | 6.85<br>(3.71) | 6.85<br>(3.68) | 1.56<br>(1.45, 1.68)                            | <b>&lt;0.0001</b>                     | 104%                        | 0.03<br>(-0.02, 0.08)                           | 0.37                                  |
| Mass merchandiser                                | –                                              | –              | 6.96<br>(3.50) | 6.99<br>(3.59) | –                                               | –                                     | –                           | -0.01<br>(-0.05, 0.02)                          | 0.70                                  |
| <b>Taxed beverages: family-sized<sup>e</sup></b> |                                                |                |                |                |                                                 |                                       |                             |                                                 |                                       |
| Supermarket                                      | 2.98<br>(1.11)                                 | 3.02<br>(1.14) | –              | –              | 0.73<br>(0.65, 0.82)                            | <b>&lt;0.0001</b>                     | 49%                         | –                                               | –                                     |
| Pharmacy                                         | 2.79<br>(0.87)                                 | 2.78<br>(0.84) | –              | –              | 1.27<br>(1.18, 1.36)                            | <b>&lt;0.0001</b>                     | 85%                         | –                                               | –                                     |
| Mass merchandiser                                | –                                              | –              | –              | –              | –                                               | –                                     | –                           | –                                               | –                                     |
| <b>Taxed beverages: sugar-sweetened</b>          |                                                |                |                |                |                                                 |                                       |                             |                                                 |                                       |
| Supermarket                                      | 3.18<br>(1.84)                                 | 3.23<br>(1.58) | 3.14<br>(1.55) | 3.11<br>(1.54) | 0.73<br>(0.64, 0.82)                            | <b>&lt;0.0001</b>                     | 49%                         | 0.02<br>(0.00, 0.05)                            | 0.10                                  |
| Pharmacy                                         | 4.19<br>(2.97)                                 | 4.26<br>(3.07) | 4.28<br>(3.14) | 4.24<br>(3.10) | 1.44<br>(1.35, 1.54)                            | <b>&lt;0.0001</b>                     | 96%                         | 0.01<br>(-0.02, 0.03)                           | 0.74                                  |
| Mass merchandiser                                | –                                              | –              | 3.14<br>(1.81) | 3.13<br>(1.81) | –                                               | –                                     | –                           | 0.00<br>(-0.01, 0.02)                           | 0.74                                  |
| <b>Taxed beverages: artificially-sweetened</b>   |                                                |                |                |                |                                                 |                                       |                             |                                                 |                                       |
| Supermarket                                      | 3.26<br>(1.41)                                 | 3.23<br>(1.93) | 3.08<br>(1.43) | 3.05<br>(1.49) | 0.73<br>(0.56, 0.89)                            | <b>&lt;0.0001</b>                     | 49%                         | 0.05<br>(0.02, 0.08)                            | <b>0.01</b>                           |
| Pharmacy                                         | 3.98                                           | 4.09           | 3.87           | 3.90           | 1.22                                            | <b>&lt;0.0001</b>                     | 81%                         | -0.03                                           | 0.17                                  |

**Appendix**  
**Sustained Impact of the Philadelphia Beverage Tax on Beverage Prices and Sales Over 2 Years**  
**Petimar et al.**

|                                                 |        |        |        |        |                |      |   |               |                   |
|-------------------------------------------------|--------|--------|--------|--------|----------------|------|---|---------------|-------------------|
|                                                 | (2.52) | (2.57) | (2.58) | (2.57) | (1.12, 1.33)   |      |   | (-0.06, 0.00) |                   |
| Mass merchandiser                               | –      | –      | 3.10   | 3.07   | –              | –    | – | 0.00          | 0.89              |
|                                                 |        |        | (1.78) | (1.75) |                |      |   | (-0.03, 0.04) |                   |
| <b>Nontaxed beverages: all</b>                  |        |        |        |        |                |      |   |               |                   |
| Supermarket                                     | 3.20   | 3.26   | 3.49   | 3.54   | -0.10          | 0.05 | – | 0.15          | <b>&lt;0.0001</b> |
|                                                 | (2.43) | (3.16) | (2.40) | (2.39) | (-0.20, -0.01) |      |   | (0.09, 0.20)  |                   |
| Pharmacy                                        | 3.46   | 3.91   | 3.36   | 3.40   | -0.10          | 0.31 | – | -0.08         | 0.17              |
|                                                 | (3.08) | (3.71) | (3.01) | (3.49) | (-0.13, -0.07) |      |   | (-0.18, 0.01) |                   |
| Mass merchandiser                               | –      | –      | 3.30   | 3.10   | –              | –    | – | 0.28          | <b>0.01</b>       |
|                                                 |        |        | (2.28) | (2.27) |                |      |   | (0.10, 0.47)  |                   |
| <b>Nontaxed beverages:<br/>individual-sized</b> |        |        |        |        |                |      |   |               |                   |
| Supermarket                                     | 7.90   | 9.20   | 8.00   | 8.84   | -0.07          | 0.57 | – | -0.05         | 0.55              |
|                                                 | (5.57) | (5.57) | (5.54) | (5.24) | (-0.31, 0.17)  |      |   | (-0.14, 0.05) |                   |
| Pharmacy                                        | 7.90   | 8.31   | 7.88   | 8.22   | 0.06           | 0.55 | – | -0.01         | 0.90              |
|                                                 | (3.99) | (3.98) | (3.88) | (4.00) | (-0.13, 0.25)  |      |   | (-0.12, 0.11) |                   |
| Mass merchandiser                               | –      | –      | 8.55   | 8.76   | –              | –    | – | 0.05          | 0.70              |
|                                                 |        |        | (4.48) | (4.27) |                |      |   | (-0.10, 0.20) |                   |
| <b>Nontaxed beverages: family-<br/>sized</b>    |        |        |        |        |                |      |   |               |                   |
| Supermarket                                     | 3.02   | 2.88   | 3.30   | 3.35   | -0.08          | 0.16 | – | 0.16          | <b>&lt;0.0001</b> |
|                                                 | (2.01) | (2.49) | (1.95) | (1.99) | (-0.17, 0.02)  |      |   | (0.10, 0.21)  |                   |
| Pharmacy                                        | 2.49   | 2.38   | 2.42   | 2.12   | -0.07          | 0.45 | – | -0.08         | 0.13              |
|                                                 | (1.70) | (2.00) | (1.64) | (1.84) | (-0.22, 0.08)  |      |   | (-0.15, 0.00) |                   |
| Mass merchandiser                               | –      | –      | 3.08   | 2.89   | –              | –    | – | 0.29          | <b>0.01</b>       |
|                                                 |        |        | (1.83) | (1.86) |                |      |   | (0.10, 0.47)  |                   |

*Note:* Boldface indicates statistical significance (adjusted  $p < 0.05$ ).

<sup>a</sup>Means and SDs were weighted by UPC volume sales. Mass merchandisers were not analyzed in Philadelphia and Baltimore because there was only 1 mass merchandiser in Baltimore.

<sup>b</sup>A generalized estimating equation was used with variables for intervention time (pre-intervention=0, post-intervention=1), city (Baltimore/MD border ZIP codes=0, Philadelphia/PA border ZIP codes=1), and an interaction term between the 2, which represents the difference-in-differences, as well as indicator variables for beverage type and beverage size. The UPCs were weighted by volume sales.

<sup>c</sup>*P*-values controlled for the false discovery rate for 16 comparisons for Philadelphia and 21 for PA border ZIP codes.

<sup>d</sup>The percent pass-through was calculated for taxed beverages as the difference-in-differences point estimate divided by 1.50 cents/ounce.

<sup>e</sup>Difference-in-differences not reported for PA border vs MD border because of a violation of pre-tax parallel trends.

**Appendix**  
**Sustained Impact of the Philadelphia Beverage Tax on Beverage Prices and Sales Over 2 Years**  
**Petimar et al.**

**Appendix Table 3.** Difference-in-Differences in Beverage Price Per Ounce 2 Years After Philadelphia Beverage Tax Implementation, Adjusting for Fiscal Quarter

| Outcome                   | Philadelphia vs Baltimore                       |                                       |                             | PA border vs MD border                          |                                       |
|---------------------------|-------------------------------------------------|---------------------------------------|-----------------------------|-------------------------------------------------|---------------------------------------|
|                           | Difference-in-differences (95% CI) <sup>a</sup> | Adjusted <i>p</i> -value <sup>b</sup> | % pass-through <sup>c</sup> | Difference-in-differences (95% CI) <sup>a</sup> | Adjusted <i>p</i> -value <sup>b</sup> |
| Taxed beverages           |                                                 |                                       |                             |                                                 |                                       |
| All                       | 1.02 (0.94, 1.11)                               | <b>&lt;0.0001</b>                     | 68%                         | 0.03 (0.01, 0.04)                               | <b>0.003</b>                          |
| Individual-sized          | 1.35 (1.24, 1.45)                               | <b>&lt;0.0001</b>                     | 90%                         | -0.05 (-0.10, -0.01)                            | <b>0.03</b>                           |
| Family-sized <sup>d</sup> | 0.93 (0.83, 1.03)                               | <b>&lt;0.0001</b>                     | 62%                         | –                                               | –                                     |
| Sugar-sweetened           | 1.04 (0.94, 1.13)                               | <b>&lt;0.0001</b>                     | 69%                         | 0.02 (0.00, 0.04)                               | <b>0.02</b>                           |
| Artificially-sweetened    | 0.96 (0.79, 1.13)                               | <b>&lt;0.0001</b>                     | 64%                         | 0.04 (0.01, 0.06)                               | <b>0.004</b>                          |
| Nontaxed beverages        |                                                 |                                       |                             |                                                 |                                       |
| All                       | -0.07 (-0.16, 0.01)                             | 0.14                                  | –                           | 0.16 (0.10, 0.22)                               | <b>&lt;0.0001</b>                     |
| Individual-sized          | 0.06 (-0.11, 0.23)                              | 0.48                                  | –                           | -0.01 (-0.08, 0.06)                             | 0.71                                  |
| Family-sized              | -0.06 (-0.15, 0.03)                             | 0.23                                  | –                           | 0.16 (0.10, 0.22)                               | <b>&lt;0.0001</b>                     |

*Note:* Boldface indicates statistical significance (adjusted *p*<0.05).

<sup>a</sup>A generalized estimating equation was used with variables for intervention time (pre-intervention=0, post-intervention=1), city (Baltimore/MD border ZIP codes=0, Philadelphia/PA border ZIP codes=1), and an interaction term between the 2, which represents the difference-in-differences, as well as indicator variables for beverage type and beverage size, and fiscal quarter. The UPCs were weighted by volume sales and store type.

<sup>b</sup>*P*-values controlled for the false discovery rate for 8 comparisons in Philadelphia and 7 in PA border ZIP codes.

<sup>c</sup>The percent pass-through was calculated for taxed beverages as the difference-in-differences point estimate divided by 1.50 cents/ounce.

<sup>d</sup>Difference-in-differences not reported for PA border vs MD border because of a violation of pre-tax parallel trends.

**Appendix**  
**Sustained Impact of the Philadelphia Beverage Tax on Beverage Prices and Sales Over 2 Years**  
**Petimar et al.**

**Appendix Table 4.** Difference-in-Differences in Beverage Price Per Ounce 2 Years After Philadelphia Beverage Tax Implementation, Excluding December Sales

| Outcome                   | Philadelphia vs Baltimore                       |                                       |                             | PA border vs MD border                          |                                       |
|---------------------------|-------------------------------------------------|---------------------------------------|-----------------------------|-------------------------------------------------|---------------------------------------|
|                           | Difference-in-differences (95% CI) <sup>a</sup> | Adjusted <i>p</i> -value <sup>b</sup> | % pass-through <sup>c</sup> | Difference-in-differences (95% CI) <sup>a</sup> | Adjusted <i>p</i> -value <sup>b</sup> |
| Taxed beverages           |                                                 |                                       |                             |                                                 |                                       |
| All                       | 1.02 (0.94, 1.10)                               | <b>&lt;0.0001</b>                     | 68%                         | 0.02 (0.01, 0.04)                               | <b>0.008</b>                          |
| Individual-sized          | 1.34 (1.23, 1.44)                               | <b>&lt;0.0001</b>                     | 89%                         | -0.05 (-0.10, -0.01)                            | <b>0.02</b>                           |
| Family-sized <sup>d</sup> | 0.93 (0.83, 1.03)                               | <b>&lt;0.0001</b>                     | 62%                         | –                                               | –                                     |
| Sugar-sweetened           | 1.04 (0.94, 1.13)                               | <b>&lt;0.0001</b>                     | 69%                         | 0.02 (0.00, 0.04)                               | <b>0.03</b>                           |
| Artificially-sweetened    | 0.96 (0.80, 1.12)                               | <b>&lt;0.0001</b>                     | 64%                         | 0.04 (0.01, 0.06)                               | <b>0.008</b>                          |
| Nontaxed beverages        |                                                 |                                       |                             |                                                 |                                       |
| All                       | -0.10 (-0.18, -0.01)                            | <b>0.04</b>                           | –                           | 0.16 (0.09, 0.22)                               | <b>&lt;0.0001</b>                     |
| Individual-sized          | 0.05 (-0.12, 0.23)                              | 0.56                                  | –                           | -0.01 (-0.08, 0.05)                             | 0.67                                  |
| Family-sized              | -0.08 (-0.17, 0.01)                             | 0.08                                  | –                           | 0.16 (0.10, 0.23)                               | <b>&lt;0.0001</b>                     |

*Note:* Boldface indicates statistical significance (adjusted  $p < 0.05$ ).

<sup>a</sup>A generalized estimating equation was used with variables for intervention time (pre-intervention=0, post-intervention=1), city (Baltimore/MD border ZIP codes=0, Philadelphia/PA border ZIP codes=1), and an interaction term between the 2, which represents the difference-in-differences, as well as indicator variables for beverage type and beverage size. The UPCs were weighted by volume sales and store type. The model also excluded December 2018 to match the pre-tax period.

<sup>b</sup>*P*-values controlled for the false discovery rate for 8 comparisons in Philadelphia and 7 in PA border ZIP codes.

<sup>c</sup>The percent pass-through was calculated for taxed beverages as the difference-in-differences point estimate divided by 1.50 cents/ounce.

<sup>d</sup>Difference-in-differences not reported for PA border vs MD border because of a violation of pre-tax parallel trends.

**Appendix**  
**Sustained Impact of the Philadelphia Beverage Tax on Beverage Prices and Sales Over 2 Years**  
**Petimar et al.**

**Appendix Table 5.** Difference-in-Differences in Beverage Price Per Ounce 2 Years After Philadelphia Beverage Tax Implementation, Including Beverages With Extreme Price Per Ounce (<1% or >99%)

| Outcome                   | Philadelphia vs Baltimore                                      |                                                 |                                       |                             | PA border vs MD border                                      |                                                 |                                       |
|---------------------------|----------------------------------------------------------------|-------------------------------------------------|---------------------------------------|-----------------------------|-------------------------------------------------------------|-------------------------------------------------|---------------------------------------|
|                           | Mean (SD) pre-tax price per ounce in Philadelphia <sup>a</sup> | Difference-in-differences (95% CI) <sup>b</sup> | Adjusted <i>p</i> -value <sup>c</sup> | % pass-through <sup>d</sup> | Mean (SD) pre-tax price per ounce in PA border <sup>a</sup> | Difference-in-differences (95% CI) <sup>b</sup> | Adjusted <i>p</i> -value <sup>c</sup> |
| Taxed beverages           |                                                                |                                                 |                                       |                             |                                                             |                                                 |                                       |
| All                       | 3.55 (2.29)                                                    | 1.04 (0.95, 1.12)                               | <b>&lt;0.0001</b>                     | 69%                         | 3.37 (2.11)                                                 | 0.02 (0.01, 0.04)                               | <b>0.003</b>                          |
| Individual-sized          | 6.37 (3.60)                                                    | 1.37 (1.26, 1.48)                               | <b>&lt;0.0001</b>                     | 91%                         | 6.32 (3.64)                                                 | -0.05 (-0.09, 0.00)                             | <b>0.04</b>                           |
| Family-sized <sup>e</sup> | 2.98 (1.16)                                                    | 0.93 (0.83, 1.04)                               | <b>&lt;0.0001</b>                     | 62%                         | –                                                           | –                                               | –                                     |
| Sugar-sweetened           | 3.57 (2.37)                                                    | 1.05 (0.96, 1.15)                               | <b>&lt;0.0001</b>                     | 70%                         | 3.41 (2.19)                                                 | 0.02 (0.00, 0.04)                               | <b>0.02</b>                           |
| Artificially-sweetened    | 3.48 (1.94)                                                    | 0.96 (0.79, 1.13)                               | <b>&lt;0.0001</b>                     | 64%                         | 3.22 (1.80)                                                 | 0.04 (0.02, 0.06)                               | <b>0.003</b>                          |
| Nontaxed beverages        |                                                                |                                                 |                                       |                             |                                                             |                                                 |                                       |
| All                       | 3.14 (2.65)                                                    | -0.07 (-0.17, 0.02)                             | 0.15                                  | –                           | 3.29 (2.54)                                                 | 0.14 (0.09, 0.20)                               | <b>&lt;0.0001</b>                     |
| Individual-sized          | 7.69 (4.66)                                                    | 0.04 (-0.13, 0.20)                              | 0.64                                  | –                           | 7.64 (4.90)                                                 | -0.02 (-0.08, 0.05)                             | 0.62                                  |
| Family-sized              | 2.76 (1.98)                                                    | -0.06 (-0.14, 0.03)                             | 0.23                                  | –                           | 3.00 (1.98)                                                 | 0.15 (0.09, 0.21)                               | <b>&lt;0.0001</b>                     |

*Note:* Boldface indicates statistical significance (adjusted *p*<0.05).

<sup>a</sup>Per 4-week period; weighted by volume sales and store type.

<sup>b</sup>A generalized estimating equation was used with variables for intervention time (pre-intervention=0, post-intervention=1), city (Baltimore/MD border ZIP codes=0, Philadelphia/PA border ZIP codes=1), and an interaction term between the 2, which represents the difference-in-differences, as well as indicator variables for beverage type and beverage size. The UPCs were weighted by volume sales and store type.

<sup>c</sup>*P*-values controlled for the false discovery rate for 8 comparisons in Philadelphia and 7 in PA border ZIP codes.

<sup>d</sup>The percent pass-through was calculated for taxed beverages as the difference-in-differences point estimate divided by 1.50 cents/ounce.

<sup>e</sup>Difference-in-differences not reported for PA border vs MD border because of a violation of pre-tax parallel trends.

**Appendix**  
**Sustained Impact of the Philadelphia Beverage Tax on Beverage Prices and Sales Over 2 Years**  
**Petimar et al.**

**Appendix Table 6.** Difference-in-Differences in Beverage Price Per Ounce After Philadelphia Beverage Tax Implementation, by Year

| Outcome                | 2017 vs 2016                                    |                                       |                             | 2018 vs 2016                                    |                                       |                             |
|------------------------|-------------------------------------------------|---------------------------------------|-----------------------------|-------------------------------------------------|---------------------------------------|-----------------------------|
|                        | Difference-in-differences (95% CI) <sup>a</sup> | Adjusted <i>p</i> -value <sup>b</sup> | % pass-through <sup>c</sup> | Difference-in-differences (95% CI) <sup>a</sup> | Adjusted <i>p</i> -value <sup>b</sup> | % pass-through <sup>c</sup> |
| Taxed beverages        |                                                 |                                       |                             |                                                 |                                       |                             |
| All                    | 0.95 (0.86, 1.04)                               | < <b>0.0001</b>                       | 63%                         | 1.02 (0.94, 1.11)                               | < <b>0.0001</b>                       | 68%                         |
| Individual-sized       | 1.15 (1.07, 1.23)                               | < <b>0.0001</b>                       | 77%                         | 1.33 (1.23, 1.44)                               | < <b>0.0001</b>                       | 89%                         |
| Family-sized           | 0.86 (0.75, 0.98)                               | < <b>0.0001</b>                       | 58%                         | 0.93 (0.83, 1.04)                               | < <b>0.0001</b>                       | 62%                         |
| Sugar-sweetened        | 0.95 (0.85, 1.06)                               | < <b>0.0001</b>                       | 64%                         | 1.04 (0.94, 1.13)                               | < <b>0.0001</b>                       | 69%                         |
| Artificially-sweetened | 0.90 (0.75, 1.05)                               | < <b>0.0001</b>                       | 60%                         | 0.96 (0.79, 1.13)                               | < <b>0.0001</b>                       | 64%                         |
| Nontaxed beverages     |                                                 |                                       |                             |                                                 |                                       |                             |
| All                    | 0.05 (0.00, 0.10)                               | 0.07                                  | –                           | –0.08 (–0.16, 0.00)                             | 0.08                                  | –                           |
| Individual-sized       | 0.11 (0.02, 0.19)                               | <b>0.02</b>                           | –                           | 0.04 (–0.12, 0.21)                              | 0.62                                  | –                           |
| Family-sized           | 0.08 (0.04, 0.13)                               | <b>0.0003</b>                         | –                           | –0.07 (–0.15, 0.02)                             | 0.15                                  | –                           |

*Note:* Boldface indicates statistical significance (adjusted *p*<0.05).

<sup>a</sup>A generalized estimating equation was used with variables for intervention time (pre-intervention=0, post-intervention=1), city (Baltimore/MD border ZIP codes=0, Philadelphia/PA border ZIP codes=1), and an interaction term between the 2, which represents the difference-in-differences, as well as indicator variables for beverage type and beverage size. The UPCs were weighted by volume sales and store type.

<sup>b</sup>*P*-values controlled for the false discovery rate for 8 comparisons.

<sup>c</sup>The percent pass-through was calculated for taxed beverages as the difference-in-differences point estimate divided by 1.50 cents/ounce.

**Appendix**  
**Sustained Impact of the Philadelphia Beverage Tax on Beverage Prices and Sales Over 2 Years**  
**Petimar et al.**

**Appendix Table 7.** Store-Level Difference-in-Differences in Beverage Volume Sales After Philadelphia Beverage Tax Implementation, by Store Type

| Outcome                                                    | Philadelphia vs Baltimore <sup>a</sup>                                         |                                                 |                                       | PA border vs MD border                                                      |                                                 |                                       |
|------------------------------------------------------------|--------------------------------------------------------------------------------|-------------------------------------------------|---------------------------------------|-----------------------------------------------------------------------------|-------------------------------------------------|---------------------------------------|
|                                                            | Mean (SD) pre-tax volume sales (ounces, millions) in Philadelphia <sup>a</sup> | Difference-in-differences (95% CI) <sup>b</sup> | Adjusted <i>p</i> -value <sup>c</sup> | Mean (SD) pre-tax volume sales (ounces, millions) in PA border <sup>a</sup> | Difference-in-differences (95% CI) <sup>b</sup> | Adjusted <i>p</i> -value <sup>c</sup> |
| <b>Taxed beverages: all</b>                                |                                                                                |                                                 |                                       |                                                                             |                                                 |                                       |
| Supermarket                                                | 5.18 (2.84)                                                                    | -62% (-75%, -42%)                               | <0.0001                               | 3.03 (1.19)                                                                 | 13% (5%, 22%)                                   | <b>0.004</b>                          |
| Pharmacy                                                   | 0.16 (0.09)                                                                    | -5% (-16%, 7%)                                  | 0.57                                  | 0.11 (0.06)                                                                 | 23% (16%, 30%)                                  | <0.0001                               |
| Mass merchandiser                                          | -                                                                              | -                                               | -                                     | 2.05 (1.37)                                                                 | 30% (16%, 46%)                                  | <0.0001                               |
| <b>Taxed beverages: individual-sized</b>                   |                                                                                |                                                 |                                       |                                                                             |                                                 |                                       |
| Supermarket                                                | 0.39 (0.21)                                                                    | -45% (-56%, -32%)                               | <0.0001                               | 0.31 (0.14)                                                                 | 12% (6%, 18%)                                   | <0.0001                               |
| Pharmacy                                                   | 0.07 (0.05)                                                                    | -13% (-19%, -8%)                                | <0.0001                               | 0.04 (0.02)                                                                 | 12% (6%, 18%)                                   | <b>0.0002</b>                         |
| Mass merchandiser                                          | -                                                                              | -                                               | -                                     | 0.22 (0.11)                                                                 | 13% (4%, 24%)                                   | <b>0.004</b>                          |
| <b>Taxed beverages: family-sized</b>                       |                                                                                |                                                 |                                       |                                                                             |                                                 |                                       |
| Supermarket                                                | 4.79 (2.67)                                                                    | -64% (-77%, -43%)                               | <0.0001                               | 2.72 (1.09)                                                                 | 13% (4%, 23%)                                   | <b>0.005</b>                          |
| Pharmacy                                                   | 0.10 (0.06)                                                                    | 1% (-15%, 20%)                                  | 0.93                                  | 0.07 (0.04)                                                                 | 30% (21%, 39%)                                  | <0.0001                               |
| Mass merchandiser                                          | -                                                                              | -                                               | -                                     | 1.83 (1.28)                                                                 | 32% (17%, 49%)                                  | <0.0001                               |
| <b>Taxed beverages: sugar-sweetened</b>                    |                                                                                |                                                 |                                       |                                                                             |                                                 |                                       |
| Supermarket                                                | 4.44 (2.54)                                                                    | -62% (-75%, -41%)                               | <0.0001                               | 2.18 (0.96)                                                                 | 12% (4%, 21%)                                   | <b>0.005</b>                          |
| Pharmacy                                                   | 0.13 (0.08)                                                                    | -5% (-16%, 8%)                                  | 0.57                                  | 0.08 (0.05)                                                                 | 23% (16%, 31%)                                  | <0.0001                               |
| Mass merchandiser                                          | -                                                                              | -                                               | -                                     | 1.68 (1.21)                                                                 | 31% (16%, 48%)                                  | <0.0001                               |
| <b>Taxed beverages: artificially-sweetened<sup>d</sup></b> |                                                                                |                                                 |                                       |                                                                             |                                                 |                                       |
| Supermarket                                                | 0.74 (0.50)                                                                    | -66% (-75%, -52%)                               | <0.0001                               | -                                                                           | -                                               | -                                     |
| Pharmacy                                                   | 0.03 (0.02)                                                                    | -4% (-14%, 7%)                                  | 0.62                                  | -                                                                           | -                                               | -                                     |
| Mass merchandiser                                          | -                                                                              | -                                               | -                                     | -                                                                           | -                                               | -                                     |
| <b>Nontaxed beverages: all</b>                             |                                                                                |                                                 |                                       |                                                                             |                                                 |                                       |
| Supermarket                                                | 6.51 (3.52)                                                                    | 6% (-3%, 15%)                                   | 0.22                                  | 3.67 (1.32)                                                                 | 8% (3%, 14%)                                    | <b>0.005</b>                          |
| Pharmacy                                                   | 0.19 (0.12)                                                                    | -1% (-8%, 6%)                                   | 0.77                                  | 0.11 (0.06)                                                                 | 19% (10%, 28%)                                  | <0.0001                               |
| Mass merchandiser                                          | -                                                                              | -                                               | -                                     | 2.67 (1.72)                                                                 | -6% (-13%, 1%)                                  | 0.17                                  |
| <b>Nontaxed beverages: individual-sized</b>                |                                                                                |                                                 |                                       |                                                                             |                                                 |                                       |
| Supermarket                                                | 0.31 (0.12)                                                                    | -1% (-7%, 6%)                                   | 0.99                                  | 0.26 (0.12)                                                                 | 3% (-1%, 7%)                                    | 0.30                                  |
| Pharmacy                                                   | 0.03 (0.03)                                                                    | 3% (-3%, 10%)                                   | 0.57                                  | 0.01 (0.01)                                                                 | 9% (2%, 16%)                                    | 0.01                                  |
| Mass merchandiser                                          | -                                                                              | -                                               | -                                     | 0.11 (0.06)                                                                 | -1% (-10%, 8%)                                  | 0.91                                  |
| <b>Nontaxed beverages: family-sized</b>                    |                                                                                |                                                 |                                       |                                                                             |                                                 |                                       |
| Supermarket                                                | 6.20 (3.44)                                                                    | 6% (-3%, 16%)                                   | 0.22                                  | 3.41 (1.23)                                                                 | 8% (3%, 14%)                                    | <b>0.005</b>                          |
| Pharmacy                                                   | 0.16 (0.11)                                                                    | -2% (-9%, 6%)                                   | 0.72                                  | 0.10 (0.06)                                                                 | 21% (12%, 30%)                                  | <0.0001                               |
| Mass merchandiser                                          | -                                                                              | -                                               | -                                     | 2.57 (1.69)                                                                 | -6% (-14%, 1%)                                  | 0.17                                  |



**Appendix**  
**Sustained Impact of the Philadelphia Beverage Tax on Beverage Prices and Sales Over 2 Years**  
**Petimar et al.**

*Note:* Boldface indicates statistical significance (adjusted  $p < 0.05$ ).

<sup>a</sup>Mass merchandisers were not analyzed in Philadelphia and Baltimore because there was only 1 mass merchandiser in Baltimore.

<sup>b</sup>A generalized estimating equation with a log link and gamma distribution was used with indicator variables for intervention time (pre-intervention=0, post-intervention=1), city (Baltimore=0, Philadelphia/PA border ZIP codes=1), and an interaction between them, which represents the difference-in-differences. Percent change was calculated as  $(\exp(\text{difference-in-differences}) - 1) * 100\%$ .

<sup>c</sup> $P$ -values controlled for the false discovery rate for 16 comparisons in Philadelphia and 21 in PA border ZIP codes.

<sup>d</sup>Difference-in-differences not reported for PA border vs MD border because of a violation of pre-tax parallel trends.

**Appendix**  
**Sustained Impact of the Philadelphia Beverage Tax on Beverage Prices and Sales Over 2 Years**  
**Petimar et al.**

**Appendix Table 8.** Store-Level Difference-in-Differences in Beverage Volume Sales After Philadelphia Beverage Tax Implementation, Adjusting For Fiscal Quarter

| Outcome                             | Philadelphia vs Baltimore                          |                                       | PA border vs MD border                             |                                       |
|-------------------------------------|----------------------------------------------------|---------------------------------------|----------------------------------------------------|---------------------------------------|
|                                     | Difference-in-differences<br>(95% CI) <sup>a</sup> | Adjusted <i>p</i> -value <sup>b</sup> | Difference-in-differences<br>(95% CI) <sup>a</sup> | Adjusted <i>p</i> -value <sup>b</sup> |
| <b>Taxed beverages</b>              |                                                    |                                       |                                                    |                                       |
| All                                 | -50% (-61%, -36%)                                  | <b>&lt;0.0001</b>                     | 16% (9%, 24%)                                      | <b>&lt;0.0001</b>                     |
| Individual-sized                    | -25% (-32%, -18%)                                  | <b>&lt;0.0001</b>                     | 13% (8%, 17%)                                      | <b>&lt;0.0001</b>                     |
| Family-sized                        | -53% (-64%, -39%)                                  | <b>&lt;0.0001</b>                     | 17% (9%, 25%)                                      | <b>&lt;0.0001</b>                     |
| Sugar-sweetened                     | -49% (-60%, -35%)                                  | <b>&lt;0.0001</b>                     | 16% (9%, 25%)                                      | <b>&lt;0.0001</b>                     |
| Artificially-sweetened <sup>c</sup> | -55% (-63%, -44%)                                  | <b>&lt;0.0001</b>                     | –                                                  | –                                     |
| <b>Nontaxed beverages</b>           |                                                    |                                       |                                                    |                                       |
| All                                 | 4% (-3%, 12%)                                      | 0.30                                  | 0% (-5%, 7%)                                       | 0.91                                  |
| Individual-sized                    | 1% (-4%, 6%)                                       | 0.65                                  | 2% (-2%, 6%)                                       | 0.52                                  |
| Family-sized                        | 4% (-3%, 12%)                                      | 0.30                                  | 0% (-6%, 7%)                                       | 0.91                                  |

*Note:* Boldface indicates statistical significance (adjusted  $p < 0.05$ ).

<sup>a</sup>A generalized estimating equation with a log link and gamma distribution was used with indicator variables for intervention time (pre-intervention=0, post-intervention=1), city (Baltimore/MD border ZIP codes=0, Philadelphia/PA border ZIP codes=1), and an interaction between them, which represents the difference-in-differences, as well as indicators for fiscal quarter. Percent change was calculated as  $(\exp(\text{difference-in-differences}) - 1) * 100\%$ .

<sup>b</sup>*P*-values controlled for the false discovery rate for 8 comparisons in Philadelphia and 7 in PA border ZIP codes.

<sup>c</sup>Difference-in-differences not reported for PA border vs MD border because of a violation of pre-tax parallel trends.

**Appendix**  
**Sustained Impact of the Philadelphia Beverage Tax on Beverage Prices and Sales Over 2 Years**  
**Petimar et al.**

**Appendix Table 9.** Store-Level Difference-in-Differences in Beverage Volume Sales After Philadelphia Beverage Tax Implementation, Excluding December 2016

| Outcome                             | Philadelphia vs Baltimore                          |                                       | PA border vs MD border                             |                                       |
|-------------------------------------|----------------------------------------------------|---------------------------------------|----------------------------------------------------|---------------------------------------|
|                                     | Difference-in-differences<br>(95% CI) <sup>a</sup> | Adjusted <i>p</i> -value <sup>b</sup> | Difference-in-differences<br>(95% CI) <sup>a</sup> | Adjusted <i>p</i> -value <sup>b</sup> |
| <b>Taxed beverages</b>              |                                                    |                                       |                                                    |                                       |
| All                                 | -50% (-61%, -37%)                                  | <b>&lt;0.0001</b>                     | 16% (9%, 24%)                                      | <b>&lt;0.0001</b>                     |
| Individual-sized                    | -26% (-33%, -18%)                                  | <b>&lt;0.0001</b>                     | 12% (8%, 17%)                                      | <b>&lt;0.0001</b>                     |
| Family-sized                        | -53% (-64%, -39%)                                  | <b>&lt;0.0001</b>                     | 16% (9%, 25%)                                      | <b>&lt;0.0001</b>                     |
| Sugar-sweetened                     | -49% (-60%, -35%)                                  | <b>&lt;0.0001</b>                     | 16% (8%, 24%)                                      | <b>&lt;0.0001</b>                     |
| Artificially-sweetened <sup>c</sup> | -55% (-63%, -44%)                                  | <b>&lt;0.0001</b>                     | –                                                  | –                                     |
| <b>Nontaxed beverages</b>           |                                                    |                                       |                                                    |                                       |
| All                                 | 5% (-3%, 13%)                                      | 0.27                                  | 1% (-5%, 7%)                                       | 0.82                                  |
| Individual-sized                    | 1% (-3%, 6%)                                       | 0.62                                  | 2% (-2%, 5%)                                       | 0.53                                  |
| Family-sized                        | 5% (-3%, 13%)                                      | 0.27                                  | 1% (-5%, 7%)                                       | 0.82                                  |

*Note:* Boldface indicates statistical significance (adjusted  $p < 0.05$ ).

<sup>a</sup>A generalized estimating equation with a log link and gamma distribution was used with indicator variables for intervention time (pre-intervention=0, post-intervention=1), city (Baltimore/MD border ZIP codes=0, Philadelphia/PA border ZIP codes=1), and an interaction between them, which represents the difference-in-differences. Percent change was calculated as  $(\exp(\text{difference-in-differences}) - 1) * 100\%$ . The model also excluded December 2018 to match the pre-tax period.

<sup>b</sup>*P*-values controlled for the false discovery rate for 8 comparisons in Philadelphia and 7 in PA border ZIP codes.

<sup>c</sup>Difference-in-differences not reported for PA border vs MD border because of a violation of pre-tax parallel trends.

**Appendix**  
**Sustained Impact of the Philadelphia Beverage Tax on Beverage Prices and Sales Over 2 Years**  
**Petimar et al.**

**Appendix Table 10.** Store-Level Difference-in-Differences in Beverage Volume Sales After Philadelphia Beverage Tax Implementation, by Year

| Outcome                             | Philadelphia vs Baltimore                       |                                       |                                                 |                                       | PA border vs MD border                          |                                       |                                                 |                                       |
|-------------------------------------|-------------------------------------------------|---------------------------------------|-------------------------------------------------|---------------------------------------|-------------------------------------------------|---------------------------------------|-------------------------------------------------|---------------------------------------|
|                                     | 2017 vs 2016                                    |                                       | 2018 vs 2016                                    |                                       | 2017 vs 2016                                    |                                       | 2018 vs 2016                                    |                                       |
|                                     | Difference-in-differences (95% CI) <sup>a</sup> | Adjusted <i>p</i> -value <sup>b</sup> | Difference-in-differences (95% CI) <sup>a</sup> | Adjusted <i>p</i> -value <sup>b</sup> | Difference-in-differences (95% CI) <sup>a</sup> | Adjusted <i>p</i> -value <sup>b</sup> | Difference-in-differences (95% CI) <sup>a</sup> | Adjusted <i>p</i> -value <sup>b</sup> |
| <b>Taxed beverages</b>              |                                                 |                                       |                                                 |                                       |                                                 |                                       |                                                 |                                       |
| All                                 | -50% (-59%, -38%)                               | <b>&lt;0.0001</b>                     | -50% (-61%, -36%)                               | <b>&lt;0.0001</b>                     | 13% (6%, 19%)                                   | <b>0.0002</b>                         | 16% (9%, 24%)                                   | <b>&lt;0.0001</b>                     |
| Individual-sized                    | -27% (-33%, -21%)                               | <b>&lt;0.0001</b>                     | -26% (-33%, -18%)                               | <b>&lt;0.0001</b>                     | 10% (6%, 14%)                                   | <b>&lt;0.0001</b>                     | 13% (8%, 17%)                                   | <b>&lt;0.0001</b>                     |
| Family-sized                        | -53% (-63%, -40%)                               | <b>&lt;0.0001</b>                     | -53% (-64%, -39%)                               | <b>&lt;0.0001</b>                     | 13% (6%, 20%)                                   | <b>0.0002</b>                         | 17% (9%, 25%)                                   | <b>&lt;0.0001</b>                     |
| Sugar-sweetened                     | -49% (-59%, -37%)                               | <b>&lt;0.0001</b>                     | -49% (-60%, -35%)                               | <b>&lt;0.0001</b>                     | 14% (7%, 21%)                                   | <b>0.0001</b>                         | 17% (9%, 25%)                                   | <b>&lt;0.0001</b>                     |
| Artificially-sweetened <sup>c</sup> | -53% (-61%, -44%)                               | <b>&lt;0.0001</b>                     | -55% (-63%, -44%)                               | <b>&lt;0.0001</b>                     | –                                               | –                                     | –                                               | –                                     |
| <b>Nontaxed beverages</b>           |                                                 |                                       |                                                 |                                       |                                                 |                                       |                                                 |                                       |
| All                                 | 1% (-4%, 6%)                                    | 0.76                                  | 4% (-3%, 12%)                                   | 0.29                                  | 1% (-2%, 5%)                                    | 0.45                                  | 0% (-5%, 7%)                                    | 0.90                                  |
| Individual-sized                    | 1% (-2%, 4%)                                    | 0.76                                  | 1% (-4%, 6%)                                    | 0.67                                  | 2% (-1%, 5%)                                    | 0.25                                  | 2% (-2%, 6%)                                    | 0.50                                  |
| Family-sized                        | 1% (-4%, 6%)                                    | 0.76                                  | 4% (-3%, 13%)                                   | 0.29                                  | 1% (-2%, 5%)                                    | 0.45                                  | 0% (-6%, 7%)                                    | 0.90                                  |

*Note:* Boldface indicates statistical significance (adjusted *p*<0.05).

<sup>a</sup>A generalized estimating equation with a log link and gamma distribution was used with indicator variables for intervention time (pre-intervention=0, post-intervention=1), city (Baltimore/MD border ZIP codes=0, Philadelphia/PA border ZIP codes=1), and an interaction between them, which represents the difference-in-differences. Percent change was calculated as (exp(difference-in-differences)-1)\*100%.

<sup>b</sup>*P*-values controlled for the false discovery rate for 8 comparisons in Philadelphia and 7 in PA border ZIP codes.

<sup>c</sup>Difference-in-differences not reported for PA border vs MD border because of a violation of pre-tax parallel trends.

**Appendix**  
**Sustained Impact of the Philadelphia Beverage Tax on Beverage Prices and Sales Over 2 Years**  
**Petimar et al.**

**Appendix Table 11.** City-Level Changes in Beverage Volume Sales Codes 2 Years After Philadelphia Beverage Tax Implementation

| <b>Outcome</b>                  | <b>Mean 2016<br/>volume<br/>sales<br/>(ounces,<br/>millions)</b> | <b>Mean 2018<br/>volume<br/>sales<br/>(ounces,<br/>millions)</b> | <b>Crude<br/>percent<br/>change</b> | <b>Difference-in-<br/>differences<br/>(95% CI)<sup>a</sup></b> | <b>Estimated<br/>change in<br/>volume<br/>sales<sup>b</sup></b> | <b>Percent<br/>change<br/>adjusted for<br/>cross-border<br/>shopping<sup>c</sup></b> | <b>Percent<br/>offset<sup>d</sup></b> |
|---------------------------------|------------------------------------------------------------------|------------------------------------------------------------------|-------------------------------------|----------------------------------------------------------------|-----------------------------------------------------------------|--------------------------------------------------------------------------------------|---------------------------------------|
| <b>Total taxed beverages</b>    |                                                                  |                                                                  |                                     |                                                                |                                                                 |                                                                                      |                                       |
| Philadelphia                    | 2,318                                                            | 1,076                                                            | -54%                                | -50% (-61%, -36%)                                              | -1,159                                                          | -35%                                                                                 | 30%                                   |
| PA border ZIP codes             | 2,243                                                            | 2,461                                                            | 10%                                 | 16% (9%, 24%)                                                  | 359                                                             | -                                                                                    |                                       |
| <b>Regular soda</b>             |                                                                  |                                                                  |                                     |                                                                |                                                                 |                                                                                      |                                       |
| Philadelphia                    | 846.4                                                            | 394.8                                                            | -53%                                | -50% (-63%, -33%)                                              | -423.2                                                          | -27%                                                                                 | 46%                                   |
| PA border ZIP codes             | 649.8                                                            | 813.3                                                            | 25%                                 | 30% (16%, 44%)                                                 | 194.9                                                           |                                                                                      |                                       |
| <b>Diet soda</b>                |                                                                  |                                                                  |                                     |                                                                |                                                                 |                                                                                      |                                       |
| Philadelphia                    | 210.1                                                            | 81.1                                                             | -61%                                | -56% (-65%, -46%)                                              | -117.7                                                          | -24%                                                                                 | 57%                                   |
| PA border ZIP codes             | 391.8                                                            | 421.2                                                            | 8%                                  | 17% (9%, 25%)                                                  | 66.6                                                            |                                                                                      |                                       |
| <b>Fruit drinks</b>             |                                                                  |                                                                  |                                     |                                                                |                                                                 |                                                                                      |                                       |
| Philadelphia                    | 506.0                                                            | 245.7                                                            | -51%                                | -46% (-58%, -31%)                                              | -232.8                                                          | -41%                                                                                 | 11%                                   |
| PA border ZIP codes             | 321.5                                                            | 328.6                                                            | 2%                                  | 8% (2%, 21%)                                                   | 25.7                                                            |                                                                                      |                                       |
| <b>Coffee drinks</b>            |                                                                  |                                                                  |                                     |                                                                |                                                                 |                                                                                      |                                       |
| Philadelphia                    | 30.0                                                             | 29.7                                                             | -1%                                 | -24% (-32%, -16%)                                              | -7.2                                                            | -24%                                                                                 | -                                     |
| PA border ZIP codes             | 34.3                                                             | 44.1                                                             | 29%                                 | -1% (-6%, 4%)                                                  | -                                                               |                                                                                      |                                       |
| <b>Total nontaxed beverages</b> |                                                                  |                                                                  |                                     |                                                                |                                                                 |                                                                                      |                                       |
| Philadelphia                    | 2,914                                                            | 3,007                                                            | 3%                                  | 4% (-3%, 12%)                                                  | -                                                               | -                                                                                    | -                                     |
| PA border ZIP codes             | 2,733                                                            | 2,814                                                            | 3%                                  | 0% (-5%, 7%)                                                   | -                                                               |                                                                                      |                                       |
| <b>Water</b>                    |                                                                  |                                                                  |                                     |                                                                |                                                                 |                                                                                      |                                       |
| Philadelphia                    | 1,724.1                                                          | 1,902.0                                                          | 10%                                 | 6% (-7%, 19%)                                                  | -                                                               | -                                                                                    | -                                     |
| PA border ZIP codes             | 1,245.5                                                          | 1,367.3                                                          | 10%                                 | 6% (-1%, 14%)                                                  | -                                                               |                                                                                      |                                       |
| <b>Fruit juice</b>              |                                                                  |                                                                  |                                     |                                                                |                                                                 |                                                                                      |                                       |
| Philadelphia                    | 366.5                                                            | 343.0                                                            | -6%                                 | 13% (5%, 22%)                                                  | 47.6                                                            | 21%                                                                                  | -                                     |
| PA border ZIP codes             | 388.9                                                            | 345.9                                                            | -11%                                | 8% (2%, 15%)                                                   | 31.1                                                            |                                                                                      |                                       |
| <b>Sparkling water</b>          |                                                                  |                                                                  |                                     |                                                                |                                                                 |                                                                                      |                                       |
| Philadelphia                    | 80.0                                                             | 99.8                                                             | 25%                                 | -13% (-29%, 6%)                                                | -                                                               | -                                                                                    | -                                     |
| PA border ZIP codes             | 103.3                                                            | 147.9                                                            | 43%                                 | 5% (-3%, 15%)                                                  | -                                                               |                                                                                      |                                       |

**Appendix**  
**Sustained Impact of the Philadelphia Beverage Tax on Beverage Prices and Sales Over 2 Years**  
**Petimar et al.**

*Note:* Boldface indicates statistical significance (adjusted  $p < 0.05$ ).

<sup>a</sup>Difference-in-differences are the same estimates as from store-level analyses in Table 3. They are included here so that they can be compared to crude percent changes and percent changes adjusting for cross-border shopping.

<sup>b</sup>Calculated by multiplying the difference-in-differences percent change estimate by pre-tax volume sales. This was done only for beverage types for which there was evidence of increased sales in PA border ZIP codes.

<sup>c</sup>The adjusted percent change in Philadelphia was calculated by summing the change in volume sales in Philadelphia to that in PA border ZIP codes, dividing this by the 2016 total in Philadelphia and multiplying by 100%.

<sup>d</sup>The percent offset represents the percentage of the total decrease in volume sales of taxed beverages in Philadelphia that was offset by increases in volume sales in border ZIP codes. It was calculated as  $((\text{DD \%change in Philadelphia} - \text{adjusted \%change in Philadelphia}) / \text{DD \%change in Philadelphia}) * 100\%$ . Percent offset was not calculated for coffee drinks because there was no change in coffee drinks sales in PA border stores.

**Appendix**  
**Sustained Impact of the Philadelphia Beverage Tax on Beverage Prices and Sales Over 2 Years**  
**Petimar et al.**

**Appendix Table 12.** Store-Level Difference-in-Differences in Beverage Volume Sales 2 Years After Philadelphia Beverage Tax Implementation, by Beverage Type

| Outcome                            | Philadelphia vs Baltimore                                                       |                                                 |                                       | PA border ZIP codes vs MD border ZIP codes                                   |                                                 |                                       |
|------------------------------------|---------------------------------------------------------------------------------|-------------------------------------------------|---------------------------------------|------------------------------------------------------------------------------|-------------------------------------------------|---------------------------------------|
|                                    | Mean (SD) pre-tax volume sales in Philadelphia (ounces, thousands) <sup>a</sup> | Difference-in-differences (95% CI) <sup>b</sup> | Adjusted <i>p</i> -value <sup>c</sup> | Mean (SD) pre-tax volume sales in PA border (ounces, thousands) <sup>a</sup> | Difference-in-differences (95% CI) <sup>b</sup> | Adjusted <i>p</i> -value <sup>c</sup> |
| <b>Taxed beverages</b>             |                                                                                 |                                                 |                                       |                                                                              |                                                 |                                       |
| Regular soda                       | 374.2 (806.1)                                                                   | −50% (−63%, −33%)                               | <b>&lt;0.0001</b>                     | 280.8 (425.7)                                                                | 30% (16%, 44%)                                  | <b>&lt;0.0001</b>                     |
| Diet soda                          | 92.9 (188.9)                                                                    | −56% (−65%, −46%)                               | <b>&lt;0.0001</b>                     | 169.3 (248.4)                                                                | 17% (9%, 25%)                                   | <b>&lt;0.0001</b>                     |
| Fruit drinks                       | 223.7 (535.5)                                                                   | −46% (−58%, −31%)                               | <b>&lt;0.0001</b>                     | 138.9 (255.4)                                                                | 8% (2%, 21%)                                    | <b>0.02</b>                           |
| Coffee drinks                      | 13.3 (24.0)                                                                     | −24% (−32%, −16%)                               | <b>&lt;0.0001</b>                     | 14.8 (24.3)                                                                  | −1% (−6%, 4%)                                   | 0.74                                  |
| Sports drinks <sup>d</sup>         | –                                                                               | –                                               | –                                     | 101.5 (158.3)                                                                | 17% (10%, 24%)                                  | <b>&lt;0.0001</b>                     |
| Iced tea and lemonade <sup>d</sup> | –                                                                               | –                                               | –                                     | 230.4 (369.0)                                                                | 11% (6%, 17%)                                   | <b>&lt;0.0001</b>                     |
| <b>Nontaxed beverages</b>          |                                                                                 |                                                 |                                       |                                                                              |                                                 |                                       |
| Water                              | 757.8 (1670.6)                                                                  | 6% (−7%, 19%)                                   | 0.38                                  | 538.3 (813.4)                                                                | 6% (−1%, 14%)                                   | 0.12                                  |
| Milk <sup>e</sup>                  | 319.5 (634.4)                                                                   | −4% (−10%, 2%)                                  | 0.20                                  | –                                                                            | –                                               | –                                     |
| Fruit juice                        | 162.0 (365.3)                                                                   | 13% (5%, 22%)                                   | <b>0.002</b>                          | 168.1 (278.9)                                                                | 8% (2%, 15%)                                    | 0.63                                  |
| Sparkling water                    | 35.5 (81.1)                                                                     | −13% (−29%, 6%)                                 | 0.20                                  | 44.6 (90.4)                                                                  | 5% (−3%, 15%)                                   | 0.30                                  |

*Note:* Boldface indicates statistical significance (adjusted *p*<0.05).

<sup>a</sup>Per 4-week period.

<sup>b</sup>A generalized estimating equation with a log link and gamma distribution was used with indicator variables for intervention time (pre-intervention=0, post-intervention=1), city (Baltimore/MD border ZIP codes=0, Philadelphia/PA border ZIP codes=1), and an interaction between them, which represents the difference-in-differences. Percent change was calculated as (exp(difference-in-differences)-1)\*100%.

<sup>c</sup>*P*-values controlled for the false discovery rate for 8 comparisons in Philadelphia and 9 in PA border ZIP codes.

<sup>d</sup>Difference-in-differences not reported for Philadelphia vs Baltimore because of a violation of pre-tax parallel trends.

<sup>e</sup>Difference-in-differences not reported for PA border vs MD border because of a violation of pre-tax parallel trends.

**Appendix**  
**Sustained Impact of the Philadelphia Beverage Tax on Beverage Prices and Sales Over 2 Years**  
**Petimar et al.**

**Appendix Table 13.** Store-Level Difference-in-Differences in Food and Alcohol Volume Sales in Philadelphia and Control Stores<sup>a</sup> After Philadelphia Beverage Tax Implementation, by Year

| Outcome                                      | 2017 vs 2016                                    |                                       | 2018 vs 2016                                    |                                       |
|----------------------------------------------|-------------------------------------------------|---------------------------------------|-------------------------------------------------|---------------------------------------|
|                                              | Difference-in-differences (95% CI) <sup>b</sup> | Adjusted <i>p</i> -value <sup>c</sup> | Difference-in-differences (95% CI) <sup>b</sup> | Adjusted <i>p</i> -value <sup>c</sup> |
| Food volume sales (g, millions)              |                                                 |                                       |                                                 |                                       |
| Candy                                        | -3% (-6%, -1%)                                  | <b>0.002</b>                          | -4% (-8%, -1%)                                  | <b>0.02</b>                           |
| Sweet snacks                                 | -8% (-10%, -5%)                                 | <b>&lt;0.0001</b>                     | -8% (-12%, -3%)                                 | <b>0.003</b>                          |
| Salty snacks                                 | -6% (-8%, -3%)                                  | <b>&lt;0.0001</b>                     | -6% (-10%, -1%)                                 | <b>0.02</b>                           |
| Beverage concentrates (total)                | 39% (28%, 51%)                                  | <b>&lt;0.0001</b>                     | 34% (19%, 51%)                                  | <b>&lt;0.0001</b>                     |
| Sweetened beverage replacements <sup>d</sup> | 36% (24%, 49%)                                  | <b>&lt;0.0001</b>                     | 32% (16%, 49%)                                  | <b>&lt;0.0001</b>                     |
| Other foods                                  | -6% (-9%, -3%)                                  | <b>0.0002</b>                         | -8% (-12%, -3%)                                 | <b>0.02</b>                           |
| Alcohol sales (ml, thousands)                |                                                 |                                       |                                                 |                                       |
| Wine                                         | 2% (-2%, 6%)                                    | 0.31                                  | 7% (1%, 14%)                                    | <b>0.03</b>                           |
| Spirits                                      | -2% (-5%, 1%)                                   | 0.17                                  | -2% (-6%, 4%)                                   | 0.56                                  |

*Note:* Boldface indicates statistical significance (adjusted  $p < 0.05$ ).

<sup>a</sup>The control location was Baltimore for food volume sales and PA non-border ZIP codes for alcohol sales.

<sup>b</sup>A generalized estimating equation with a log link and gamma distribution was used with indicator variables for intervention time (pre-intervention=0, post-intervention=1), city (control=0, Philadelphia=1), and an interaction between them, which represents the difference-in-differences. Percent change was calculated as  $(\exp(\text{difference-in-differences}) - 1) * 100\%$ .

<sup>c</sup>*P*-values controlled for the false discovery rate for 5 comparisons for food volume sales (the number of food categories tested within each year) and 2 comparisons for alcohol sales (the number of alcohol categories).

<sup>d</sup>Excludes coffee, tea, and milk mixes.
